# Supplementary material
Source: PubMed Central journal article supplement (PMC10805259)
Supplement: PR72_753_Supplementarymaterials.pdf [file PR72_753_Supplementarymaterials.pdf]

Homo sapiens ELAV like RNA binding protein 1 (ELAVL1), mRNA  
NCBI Reference Sequence: NM\_001419.3

GenBank Graphics

>NM\_001419.3:164-1144 Homo sapiens ELAV like RNA binding protein 1 (ELAVL1), mRNA  
ATGTCTAATGGTTATGAAGACCACATGGCCGAAGACTGCAGGGGTGACATCGGGAGAA  
CGAATTTGATCGTCAACTACCTCCCTCAGAACATGACCCAGGATGAGTTACGAAGCCT  
GTTTCAGCAGCATTGGTGAAGTTGAATCTGCAAACTTATTCGGGATAAAGTAGCAGGA  
CACAGCTTGGGCTATGGCTTTGTGAACTACGTGACCGCGAAGGATGCAGAGAGAGCGA  
TCAACACGCTGAACGGCTTGAGGCTCCAGTCAAAAACCATTAAGGTGTCGTATGCTCG  
CCCGAGCTCAGAGGTGATCAAAGACGCCAACTTGTACATCAGCGGGCTCCCGCGGAC  
CATGACCCAGAAGGACGTAGAAGACATGTTCTCTCGGTTTGGGCGGATCATCAACTCG  
CGGGTCCTCGTGGATCAGACTACAGGTTTGTCCAGAGGGGTTGCGTTTATCCGGTTTG  
ACAAACGGTCGGAGGCAGAAGAGGCAATTACCAGTTTCAATGGTCATAAACCCCCAG  
GTTCTCTGAGCCCATCACAGTGAAGTTTGCAGCCAACCCCAACCAGAACAAAAACG  
TGGCACTCCTCTCGCAGCTGTACCACTCGCCAGCGCGACGGTTCGGAGGCCCGTTCA  
CCACCAGGCGCAGAGATTAGGTTCTCCCCATGGGCGTCGATCACATGAGCGGGCTC  
TCTGGCGTCAACGTGCCAGGAAACGCCTCCTCCGGCTGGTGCATTTTCATCTACAACCT  
GGGGCAGGATGCCGACGAGGGGATCCTCTGGCAGATGTTTGGGCCGTTTGGTGCCGTC  
ACCAATGTGAAAGTGATCCGCGACTTCAACACCAACAAGTGCAAAGGGTTTGGCTTTG  
TGACCATGACAACTATGAAGAAGCCGCGATGGCCATAGCCAGCCTGAACGGCTACCG  
CCTGGGGGACAAAATCTTACAGGTTTCTTCAAACCAACAAGTCCCACAAATAA
